# Supplementary material for: Association of GLP-1 secretion with parameters of glycemic control in women after gestational diabetes mellitus
Source: PubMed Central journal article supplement — BMJ Open Diabetes Res Care. 2024 Jan 10;12(1):e003706. doi: 10.1136/bmjdrc-2023-003706 (PMC10806896; doi:10.1136/bmjdrc-2023-003706), 2024-01-10
Supplement: bmjdrc-2023-003706supp001.pdf [file bmjdrc-2023-003706supp001.pdf]

Suppl. Figure 1

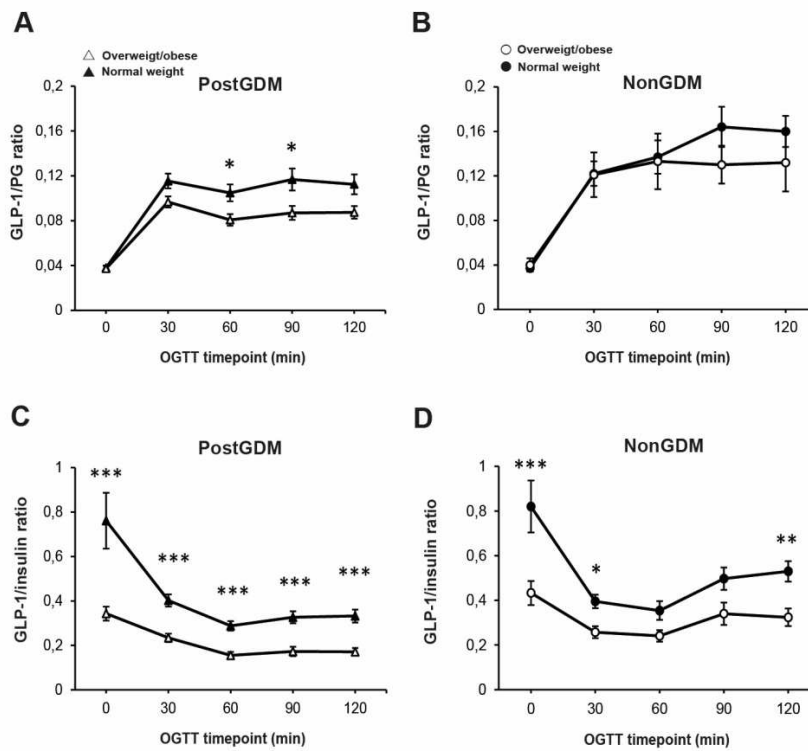

**Supplemental Figure 1. Comparison of GLP-1/PG ratios and GLP-1/Ins ratios in post-GDM and non-GDM women for the comparison of overweight/obesity and normal weight states during 75 g OGTT.**

Women with previous GDM (A, C) and controls (B, D) were compared between overweight/obesity (BMI  $\geq 25$  kg/m<sup>2</sup>) and normal weight (BMI  $<25$  kg/m<sup>2</sup>) states.

Data are shown as mean  $\pm$  SEM during OGTT at baseline visit.

\* $p < 0.05$ , \*\* $p < 0.01$ , \*\*\* $p < 0.001$ , calculated by Mann-Whitney U Test
