# Supplementary material for: Association of GLP-1 secretion with parameters of glycemic control in women after gestational diabetes mellitus
Source: PubMed Central journal article supplement — BMJ Open Diabetes Res Care. 2024 Jan 10;12(1):e003706. doi: 10.1136/bmjdrc-2023-003706 (PMC10806896; doi:10.1136/bmjdrc-2023-003706), 2024-01-10
Supplement: bmjdrc-2023-003706supp002.pdf [file bmjdrc-2023-003706supp002.pdf]

**Supplemental Table 1** Correlation between circulating GLP-1 and plasma glucose and insulin levels during 75 g OGTT.

| OGTT minute | GLP-1 and PG |                   | GLP-1 and insulin |              |
|-------------|--------------|-------------------|-------------------|--------------|
|             | rho          | p-value           | rho               | p-value      |
| 0           | 0.01         | 0.86              | 0.13              | 0.07         |
| 30          | 0.31         | <b>&lt;0.0001</b> | 0.20              | <b>0.004</b> |
| 60          | -0.03        | 0.65              | 0.02              | 0.80         |
| 90          | -0.14        | 0.053             | -0.07             | 0.30         |
| 120         | -0.17        | <b>0.017</b>      | -0.07             | 0.36         |

GLP-1 levels were correlated with plasma glucose (PG) and insulin concentrations during 5-point OGTT using Spearman coefficient in post-GDM women.
